# 1 Nonparametric inference of the distribution of fitness effects 2 across functional categories in humans

3 Fernando Racimo<sup>1,\*</sup>, Joshua G. Schraiber<sup>1</sup>,

4 1 Department of Integrative Biology, University of California, Berkeley, CA, USA

5 \* E-mail: [fernandoracimo@gmail.com](mailto:fernandoracimo@gmail.com)

## 6 Abstract

7 Quantifying the proportion of polymorphic mutations that are deleterious or neutral is of fundamental  
8 importance to our understanding of evolution, disease genetics and the maintenance of variation genome-  
9 wide. Here, we develop an approximation to the distribution of fitness effects (DFE) of segregating  
10 single-nucleotide mutations in humans. Unlike previous methods, we do not assume that synonymous  
11 mutations are neutral, or rely on fitting the DFE of new nonsynonymous mutations to a particular para-  
12 metric probability distribution, which is poorly motivated on a biological level. We rely on a previously  
13 developed method that utilizes a variety of published annotations (including conservation scores, protein  
14 deleteriousness estimates and regulatory data) to score all mutations in the human genome based on how  
15 likely they are to be affected by negative selection, controlling for mutation rate. We map this score to  
16 a scale of fitness coefficients via maximum likelihood using diffusion theory and a Poisson random field  
17 model. We then use our coefficient mapping to quantify the distribution of all scored single-nucleotide  
18 polymorphisms in Yoruba and Europeans. Our method serves to approximate the DFE of any type of  
19 segregating mutations, regardless of its genomic consequence, and so allows us to compare the proportion  
20 of mutations that are negatively selected or neutral across various genomic categories, including differ-  
21 ent types of regulatory sites. We observe that the distribution of intergenic polymorphisms is highly  
22 leptokurtic, with a strong peak at neutrality, while the distribution of nonsynonymous polymorphisms  
23 is bimodal, with a neutral peak and a second peak at  $s \approx -10^{-4}$ . Other types of polymorphisms have  
24 shapes that fall roughly in between these two.

## 25 Author Summary

26 The relative frequencies of polymorphic mutations that are deleterious, nearly neutral and neutral is  
 27 traditionally called the distribution of fitness effects (DFE). Obtaining an accurate approximation to  
 28 this distribution in humans can help us understand the nature of disease and the mechanisms by which  
 29 variation is maintained in the genome. Previous methods to approximate this distribution have relied  
 30 on fitting the DFE of new mutations to standard parametric probability distributions, like a normal or  
 31 an exponential distribution. Here, we provide a novel method that does away with using parametric  
 32 DFE approximations by relying on genomic scores designed to reflect the strength of negative selection  
 33 operating on any site in the human genome. We use a maximum likelihood mapping approach to fit these  
 34 scores to a scale of neutral and negative fitness coefficients. Finally, we compare the shape of the DFEs  
 35 we obtain from this mapping across populations as well as different types of functional categories. We  
 36 observe a highly leptokurtic distribution of polymorphisms, with a strong peak at neutrality, as well as a  
 37 second peak of deleterious effects when restricting to nonsynonymous polymorphisms.

## 38 Introduction

39 Genetic variation within species is shaped by a variety of evolutionary processes, including mutation,  
 40 demography, and natural selection. With the advent of whole-genome sequencing, we can make unprece-  
 41 dented inferences about these and other processes by analyzing population genomic data. An important  
 42 goal is to understand the extent to which segregating genetic variants are impacted by natural selection,  
 43 and to quantify the intensity of natural selection acting genome-wide. Understanding the prevalence of  
 44 different modes of selection on a genomic scale has wide-ranging implications across evolutionary and  
 45 medical genetics. For instance, genome-wide association studies (GWAS) are searching for mutations  
 46 associated with disease in large samples of humans. Because mutations associated with disease are *a*  
 47 *priori* likely to be deleterious, quantifying the portion of mutations that are deleterious along with their  
 48 average effects could have significant implications for the design and interpretation of GWAS. Moreover,  
 49 recently, the ENCODE project [1] has claimed that much of the genome is involved in some kind of vital  
 50 molecular function. Although this has been disputed [2], quantifying the DFE in noncoding regions is  
 51 a first step toward understanding the fitness implications of rampant functional activity at the genomic  
 52 level.

Traditionally, studies have sought to estimate the distribution of fitness effects (DFE) for nonsynonymous mutations by using summary statistics based on the number of polymorphisms and substitutions [3–5] and/or the full frequency spectrum [6–8]. These studies typically assume that synonymous variation is neutral. Many of these analyses suggest that the distribution of deleterious fitness effects is strongly leptokurtic; that is, while most nonsynonymous mutations are nearly neutral, there is a significant probability that an amino acid changing mutation will be strongly deleterious. While these studies were limited to analysis of protein-coding genes, recently work has focused on quantifying the DFE in regulatory regions, including short interspersed genomic elements such as enhancers [9, 10] and cis-regulatory regions [11]. A review of many of these approaches can be found in ref. [12].

There are several obstacles to quantifying the DFE of new or segregating mutations genome-wide. First, inferences about the DFE are confounded by demography [13]. For example, a high proportion of low frequency derived alleles is a signature of negative selection, but can also be caused by recent population growth [14]. Hence, a well-supported demographic model must be used to appropriately control for population history when inferring the DFE. Second, most current methods rely on dividing up polymorphisms into either putatively neutral or putatively selected sites (for example, synonymous and nonsynonymous sites). Because of the reduced resolution afforded by having only two classes of sites, these studies have relied on fitting the DFE of new mutations to a parametric distribution, typically an exponential or gamma distribution [3, 7]. While flexible, these distributions may miss some important features of the DFE [15]. For example, mutation accumulation experiments suggest that the DFE may be bimodal, with most mutations either being nearly neutral or strongly deleterious, with very few in between [16, 17]. Thus, fitting a parametric distribution with a single mode may not capture all the relevant information about the DFE (but see [18] for an example of fitting a multimodal DFE to population genetic data and [15, 19] for nonparametric approaches to estimating the DFE of new amino-acid changing mutations). Finally, previous studies have been restricted to analyzing specific subclasses of mutations (e.g. nonsynonymous, enhancers, etc.) because until recently, no single metric existed that could serve to compare the disruptive potential of any type of variant, regardless of its genomic consequence.

Recently, Kircher et al. [20] developed a method to synthesize a large number of annotations into a single score to predict the pathogenicity or disruptive potential of any mutation in the genome. It is based on an analysis comparing real and simulated changes that occurred in the human lineage since

the human-chimpanzee ancestor, and that are now fixed in present-day humans. The method relies on the realistic assumption that the set of real changes is depleted of deleterious variation due to the action of negative selection, which has pruned away disruptive variants, while the simulated set is not depleted of such variation. A support vector machine (SVM) was trained to distinguish the real from the simulated changes using a kernel of 63 annotations (including conservation scores, regulatory data and protein deleteriousness scores), and then used to assign a score (C-score) to all possible single-nucleotide changes in the human genome, controlling for local variation in mutation rates. These C-scores are meant to be predictors of how disruptive a given change may be, and are comparable across all types of sites (nonsynonymous, synonymous, regulatory, intronic or intergenic). Thus, they allow for a strict ranking of predicted functional disruption for mutations that may not be otherwise comparable. C-scores are PHRED scaled, with larger values corresponding to more disruptive effects.

Importantly, human-specific genetic variation patterns are not used as input to train the C-score SVM. In this work, we make use of the C-scores to provide a fine-grained stratification of deleteriousness in modern human populations. Using the 1000 Genomes dataset [21,22], we take advantage of the Poisson random field model [23,24] with a realistic model of human demographic history to fit a maximum likelihood selection coefficient for each C-score, creating a mapping from C-scores to selection coefficients. Using this mapping, we obtain a high-resolution picture of the DFE in Europeans and Africans, and explore the DFE of different mutational consequences.

## Results

### A mapping from C-scores to selection coefficients

To map C-scores to selective coefficients, we obtained allele frequency information from 176 low-coverage Yoruba (YRI) chromosomes from the 1000 Genomes Project Phase 1 data [21,22]. We tested only models of neutral evolution and negative selection, because C-scores are uninformative about adaptive vs. deleterious disruption (i.e. a high C-score could either reflect a highly deleterious change or a highly adaptive change), and, because we are using polymorphism data only, positive selection should contribute little to the site-frequency spectrum [25].

We began by binning sites into C-scores rounded up to the nearest integer and computed the site frequency spectrum for each bin (Figure S1). We then fit the lowest possible C-score ( $C = 0$ ), presumed

111 to be neutral, to different models of demographic history. We compared constant population size, expo-  
112 nential growth (fitting the parameters by maximum likelihood; see Methods) and the model inferred in  
113 Harris and Nielsen [26] from the distribution of tracts of identity by state (IBS) (Figure S2). We find that  
114 the constant population size and the Harris and Nielsen models fit the data approximately equally well  
115 and better than any of the exponential growth models we tried. We picked the Harris and Nielsen model  
116 for downstream analyses, as it is based on haplotype information (the distribution of tracts of identity  
117 by state), and may thus be a better reflection of the true demographic history.

118 We next fit a selection coefficient to the site frequency spectrum for each  $C < 40$  using maximum  
119 likelihood (see Methods). We restricted to  $C < 40$  because very few sites have  $C \geq 40$ , and hence  
120 estimates of the selection coefficients for those C-scores are unreliable. Predictably, the lowest C-score  
121 bin ( $C = 0$ ) fits the neutral model ( $s = 0$ ) best, as that was the bin used in the neutral demographic  
122 fitting. In addition, the next highest bin ( $C = 1$ ) also maps to  $s=0$ . Figure S3 shows that the site  
123 frequency spectra of the C-score bins are well-modeled by our maximum likelihood fits.

124 We aimed to test the robustness of the selection coefficient estimates within each bin. We were specif-  
125 ically concerned about highly deleterious bins, which are composed of a smaller number of segregating  
126 sites than neutral or nearly neutral bins, and could produce unstable or biased estimates. We obtained  
127 bootstrapped confidence intervals for each bin and observe that the mappings are relatively stable up to  
128  $C = 36$ . As expected, the standard deviation of the bootstrap estimates is strongly negatively correlated  
129 with the sample-size per bin (Figure S4, Pearson correlation coefficient = -0.933). Thus, most of the  
130 increase in the width of the confidence intervals observed at higher C-score bins can be explained by the  
131 small number of polymorphisms available in those bins, and is likely not the result of other unaccounted  
132 processes, such as positive selection, operating exclusively on highly scored polymorphisms.

133 After removing the C-score bins that best fit the neutral model, the remaining C-scores plotted as  
134 a function of  $\log_{10}(-s)$  appear to have an odd-degree polynomial shape. Using least-squares regression,  
135 we fit different polynomial functions to the mapping, as well as an inverted logistic curve, to obtain  
136 a continuous function from C-scores to  $\log_{10}(-s)$ . Although the 5th and 7th degree polynomials fit  
137 approximately equally well (residuals of .1962 and .1819, respectively), we chose the 5th degree fit because  
138 the 7th degree mapping showed signs of overfitting (Figure S5). Figure 1 shows our mapping of C-scores  
139 to selection coefficients, including confidence intervals obtained by bootstrapping the data in each bin  
140 100 times. Interestingly, there is a plateau from approximately  $C = 10$  to  $C = 30$  where a variety of  $C$

141 scores correspond to identical selection coefficients. After approximately  $C = 30$ , the strength of selection  
142 increases substantially.

143 To test for the robustness of our mapping, we performed the same fitting procedure on a variety of  
144 other conservation and deleteriousness scores (see Methods). Figure S6 shows that mappings are fairly  
145 consistent across different choices of scores, except for highly deleterious bins, which we were already  
146 excluding from the analysis. In the following, we only report results using the C-score mapping, as this  
147 score has been shown to be a better correlate to functional disruption and pathogenicity than all the other  
148 conservation scores mentioned above, and also controls for mutation rate variation across the genome,  
149 while other scores do not [20]. Additionally, Figure S7 show that this score is the best at distinguishing  
150 nonsynonymous from synonymous changes.

## 151 The distribution of fitness effects of segregating mutations in Yorubans and 152 Europeans

153 Using the C-score-to-selection coefficient mapping, we obtained the DFE of segregating polymorphisms in  
154 Yoruba individuals. This distribution is highly leptokurtic when all polymorphisms are considered (Figure  
155 2, black dashed line), with a considerably high peak at neutrality and a long tail of deleterious mutations,  
156 as has been observed before when estimating the DFE of coding sequences [3, 5–7, 13]. Interestingly, we  
157 observe a pronounced drop in frequency for values of  $s < -10^{-4}$ . We note that this is not due to our  
158 capping our mapping at  $C = 39$  as the selection coefficients we are able to map are of a greater magnitude  
159 than this drop.

160 When we partition the data by the genomic consequence of the polymorphisms, some classes exhibit  
161 a peak of highly deleterious changes around  $s = -10^{-4}$ . This peak results in a bimodal distribution  
162 that is especially pronounced for nonsynonymous sites (Figure 2, red line), and is almost non-existent for  
163 intergenic sites (Figure 2, pink line). Synonymous polymorphisms also show a highly deleterious peak; this  
164 may indicate selection for optimal codon usage [27] and may be consistent with a recent finding of strong  
165 synonymous selection in *Drosophila* [28], but could also result from widespread patterns of background  
166 selection during human evolution [35, 36]. Other types of polymorphisms—like splice site, 3' UTR, 5' UTR  
167 and regulatory mutations—have a bimodal distribution, though with an smaller deleterious peaks than  
168 for coding sites (Figure 2). We can compare the selection coefficient distributions to the distributions of  
169 unmapped C-scores (Figure S8) which are much less tightly peaked at intermediate deleterious values and

do not show a sharp decrease in density for highly deleterious polymorphisms, as does the  $s$  distribution in Figure 2. We show various statistics calculated on each of the selection coefficient distributions in Table 1.

Next, we partitioned the data by whether the polymorphisms were found in the GWAS database [29] or not (Figure S9, Table 1). We observe a second deleterious peak among the GWAS SNPs, too, but these SNPs are also highly enriched for neutral polymorphisms. In addition, we classified polymorphisms by different ENCODE categories using the RegulomeDB classifier [30] (Figure S10, Table 2).

Finally, we compared the distribution of fitness effects between Yoruba and Europeans. We observe a slight excess of deleterious sites in Europeans, consistent with previous studies [6, 31] (Figure 3). This is especially prominent for nonsynonymous polymorphisms with  $s < -10^{-4}$ : we estimate that 3.1% of nonsynonymous segregating polymorphisms in Europeans fall in this category, while the same is true for 2.5% of nonsynonymous segregating polymorphisms in Yoruba. However, we caution that this is based on inferring the C-to-s mapping at values of  $s$  for which there exist very few segregating mutations.

## Discussion

The distribution of fitness effects (DFE) describes the proportion of mutations with given selection coefficients. Knowledge of the DFE has profound implications for our understanding of evolution and health. We believe ours is the first study to estimate the distribution of deleterious fitness effects in human polymorphisms genome-wide, without assuming a parametric probability distribution for the DFE. We infer a highly leptokurtic distribution for all polymorphisms, with a sudden drop in density at  $s \approx -10^{-4}$ , which may be the cutoff between weakly deleterious and nearly neutral segregating mutations and highly deleterious mutations that are easily pruned away by negative selection.

Our inferred non-synonymous distribution is bimodal and looks very similar to the one obtained for nonsynonymous mutations in *Drosophila* in ref. [5], with a peak at neutrality and another peak at  $s \approx 0.9 \times 10^{-4}$ , albeit with the difference that the neutral peak we observe in humans is relatively larger. Several experimental studies have also shown that non-synonymous non-lethal mutations tend to have a multimodal DFE in model organisms [32, 33] (see ref. [12] for a comprehensive review). We note that it is impossible to obtain such kinds of distributions using a gamma or lognormal probability distribution unless one approximates bimodality by assuming a second, separate class of nonsynonymous mutations

198 that are completely neutral and do not follow the best-fitting probability distribution [5, 7, 13, 18].

199 Importantly, unlike previous studies, we also obtain DFEs for other types of mutations, including  
200 synonymous, splice site, 3' UTR, 5' UTR and regulatory polymorphisms, which exhibit bimodality to  
201 a lesser degree than the nonsynonymous DFE. In particular, 5' UTR changes constitute the category  
202 with the smallest proportion of neutral polymorphisms after nonsynonymous changes, likely reflecting  
203 selection on gene regulation upstream of coding sequences. Furthermore, distributions corresponding to  
204 mutations in UTR and regulatory regions have a less pronounced trough between the two peaks than  
205 the ones observed among coding mutations, suggesting that the magnitude of deleterious effects is more  
206 uniformly distributed in non-coding regions. In contrast, missense mutations appear to have more of an  
207 "all-or-nothing" effect, as would perhaps be expected when replacing an amino acid inside a protein.

208 Our method does not assume that synonymous changes are neutral, as do other studies [3, 5, 13].  
209 Given that there is evidence for selection for codon usage in humans [34] and that our inferred DFE  
210 for synonymous polymorphisms also exhibits a highly-deleterious peak, the assumption that synonymous  
211 sites are neutral may no longer be viable. A second possibility is widespread patterns of background  
212 selection in human evolution [35, 36]. This could also lead to a depletion of synonymous mutations from  
213 the list of fixed human-chimpanzee differences, resulting in the SVM machine associating synonymous  
214 mutations with higher C-scores than one would expect under a model with no linked selection. In contrast,  
215 it seems intergenic polymorphisms are the class of sites most likely to be governed by neutrality. Because  
216 this class is so abundant, most of the signal observed when all polymorphisms are pooled together closely  
217 reflects the distribution observed for intergenic polymorphisms.

218 Our results have implications for GWAS, as we find a high proportion of GWAS SNPs to be neutral  
219 or nearly neutral, which could suggest a high rate of false positives in this type of association studies,  
220 although GWAS studies only aim to find polymorphisms linked to causative variants. Alternatively, if  
221 the effect size of many GWAS SNPs are sufficiently small, it is possible that many of them are not subject  
222 to strong selection.

223 Additionally, by stratifying our results based on different ENCODE categories, we can elucidate the  
224 fitness consequences of the molecular activity detected by ENCODE. We find the category with the lowest  
225 proportion of neutral polymorphisms to be the one corresponding to sites that have eQTL evidence as  
226 well as evidence for transcription factor (TF) binding, a matched TF motif, a matched DNase footprint  
227 and that are located in a DNase peak. In general, categories that combine many regulatory signals tend



228 to show lower proportions of neutral mutations than those that do not, suggesting that data integration  
229 across distinct approaches to detecting selection and functionality is likely to do better than any individual  
230 approach [37]. Moreover, this suggests that much of the molecular activity detected by ENCODE may  
231 not have significant fitness consequences.

232 There are several limitations to our method. First, we have restricted ourselves to estimating the DFE  
233 of segregating mutations that have reached appreciable frequencies in the population. An extension of this  
234 approach would be to infer the DFE of new mutations from the DFE of segregating mutations genome-  
235 wide. Second, we assumed no dominance or epistasis. Future studies could attempt to incorporate a  
236 distribution of heterozygous and epistatic effects into our approach. In addition, we have assumed sites  
237 are independent and have therefore ignored the covariance between linked sites, which likely leads to  
238 an underestimation of confidence intervals obtained from the bootstrapping. The free-recombination  
239 assumption may also affect inference due to Hill-Robertson interference between mutations subject to  
240 selection [38] as well as linked background selection affecting the SFS of neutral sites in the human  
241 genome [36]. This may be a more important issue in our case than other genic-only approaches because  
242 we are also including intergenic mutations in our analysis, so the space between analyzed polymorphisms  
243 is on average smaller than if we were only looking at coding polymorphisms [13]. We also assume  
244 no positive selection. This, however, should not be a major problem, because we are only basing our  
245 inferences on polymorphic sites and advantageous mutations contribute little to polymorphism, assuming  
246  $N_e s > 25$  [25]. One final limitation is that the type of inference performed here is only possible in species  
247 in which C-scores have been estimated (for now, humans only). Nevertheless, it should not be hard  
248 to obtain C-scores for other organisms in the future, although limitations on available annotations for  
249 non-human organisms may make the approximation to the fitness distribution less accurate.

## 250 Materials and Methods

### 251 Site frequency spectrum likelihoods

252 We used the theory developed by Evans *et al.* [39] to obtain the expected population site frequency  
253 spectrum with non-equilibrium demography. Writing  $f(x, t)$  for the frequency spectrum at frequency  $x$   
254 and time  $t$  and  $g(x, t) := x(1 - x)f(x, t)$ , we can approximate the dynamics of  $g(x, t)$  with selection and  
255 mutation by solving the following partial differential equation:

$$\frac{\partial}{\partial t}g(x, t) = -Sx(1-x)\frac{\partial}{\partial x}[g(x, t)] + \frac{x(1-x)}{2\rho(t)}\frac{\partial^2}{\partial x^2}[g(x, t)] \quad (1)$$

subject to boundary condition:

$$\lim_{x \downarrow 0} g(x, t) = \theta\rho(t) \quad (2)$$

where  $S$  is the population-scaled selection coefficient ( $S = 2N(0)s$ ),  $\theta$  is the population-scaled mutation rate ( $\theta = 4N(0)\mu$ ) and  $\rho(t) = N(t)/N(0)$  is the population size at time  $t$  relative to the population size at time 0. For the constant population size model,  $\rho(t) = 1$ , for the exponential growth model  $\rho(t) = \exp(Rt)$  where  $R = 2N(0)r$  is the population scaled growth rate and for the model of Harris and Nielsen,  $\rho(t)$  is piecewise defined according to their Figure 7.

We solve for  $g(x, t)$  numerically in Mathematica, and can then compute the expected number of segregating sites with  $i$  copies of the derived allele out of a sample of  $n$  genes,

$$f_{n,i}(t) = \int_0^1 x^{i-1}(1-x)^{n-i-1}g(x, t)dx. \quad (3)$$

To compute the likelihood of the observed site frequency spectrum,  $S = (s_1, s_2, \dots, s_{n-1})$  where  $s_i$  is the number of sites with  $i$  copies of the derived allele, for a given model,  $M$ , which includes both demography and selection, we observe that the probability that a given site in a sample of size  $n$  has  $i$  copies of the derived allele is

$$p_{n,i}(t) = \frac{f_{n,i}(t)}{\sum_{j=1}^{n-1} f_{n,j}(t)}. \quad (4)$$

Thus, the likelihood of  $S$  is

$$L(S|M) = \prod_{i=1}^{n-1} p_{n,i}. \quad (5)$$

We provide Mathematica scripts implementing this computation upon request.

## Maximum likelihood fitting of exponential growth

The exponential growth model has two free parameters,  $r$ , the per generation growth rate and  $t$ , the total time of exponential growth. We first obtained the site frequency spectrum for all sites with  $C = 0$ . Next we solved  $g(x, t)$  for the exponential growth model across a grid of  $t$  and  $r$ , and computed the likelihood

274 of the data under each model.

## 275 Maximum likelihood fitting of selection coefficients

276 To find the maximum likelihood estimate of  $s$  for each C-score bin, we first obtained the site frequency  
277 spectrum corresponding to each C-score bin. Next, we solved  $g(x, t)$  under the Harris and Nielsen  
278 demography for  $\log_{10}(-s) \in [-6, -1.5]$  in steps of 0.05, along with  $s = 0$ . The selection coefficient with  
279 the highest likelihood was assigned to that C-score bin. After this assignment, the distributions were  
280 plotted using kernel density estimation with smoothing bandwidth = 0.00001.

## 281 Testing robustness of the mapping

282 To test how robust the mapping of C-scores to selection coefficients is to different types of conservation  
283 scores, we obtained PhyloP [40] and PhastCons [41] scores derived from vertebrate, mammal and primate  
284 alignments (excluding humans), as well as GERP S scores [42], for all YRI SNPs. We attempted to  
285 equalize the range of all scores by PHRED-scaling them, i.e. converting each score to  $-\log_{10}(p)$  where  $p$   
286 is the probability of observing a change as or more disruptive / conserved (based on that particular score  
287 scale) among all polymorphic YRI sites. We note that this is different from the natural PHRED scale  
288 of C-scores (where  $p$  is the the probability of observing a score as or more disruptive among all possible,  
289 but not necessarily realized, mutations in the human genome), and so we also re-scaled the C-scores to  
290 produce a fair comparison. Then, we repeated the maximum likelihood mapping for each PHRED-scaled  
291 score in bins of 0.25 units (e.g. 0-0.125, 0.125-0.375, 0.375-0.625, etc).

## 292 Acknowledgments

293 We thank Montgomery Slatkin and Rasmus Nielsen for helpful advice and discussions, and Martin Kircher  
294 for providing the C-score data and other annotations.

## 295 References

- 296 1. Dunham I, Kundaje A, Aldred S, Collins P, Davis C, et al. (2012) An integrated encyclopedia of  
297 DNA elements in the human genome. Nature 489: 57–74.

- 298 2. Graur D, Zheng Y, Price N, Azevedo RB, Zufall RA, et al. (2013) On the immortality of television  
299 sets: "function" in the human genome according to the evolution-free gospel of ENCODE. *Genome*  
300 *biology and evolution* 5: 578–590.
- 301 3. Piganeau G, Eyre-Walker A (2003) Estimating the distribution of fitness effects from DNA sequence  
302 data: Implications for the molecular clock. *Proceedings of the National Academy of Sciences* 100:  
303 10335–10340.
- 304 4. Sawyer SA, Kulathinal RJ, Bustamante CD, Hartl DL (2003) Bayesian analysis suggests that  
305 most amino acid replacements in *Drosophila* are driven by positive selection. *Journal of molecular*  
306 *evolution* 57: S154–S164.
- 307 5. Loewe L, Charlesworth B, Bartolomé C, Noël V (2006) Estimating selection on nonsynonymous  
308 mutations. *Genetics* 172: 1079–1092.
- 309 6. Keightley PD, Eyre-Walker A (2007) Joint inference of the distribution of fitness effects of deleteri-  
310 ous mutations and population demography based on nucleotide polymorphism frequencies. *Genetics*  
311 177: 2251–2261.
- 312 7. Boyko AR, Williamson SH, Indap AR, Degenhardt JD, Hernandez RD, et al. (2008) Assessing the  
313 evolutionary impact of amino acid mutations in the human genome. *PLoS genetics* 4: e1000083.
- 314 8. Wilson DJ, Hernandez RD, Andolfatto P, Przeworski M (2011) A population genetics-phylogenetics  
315 approach to inferring natural selection in coding sequences. *PLoS genetics* 7: e1002395.
- 316 9. Arbiza L, Gronau I, Aksoy BA, Hubisz MJ, Gulko B, et al. (2013) Genome-wide inference of natural  
317 selection on human transcription factor binding sites. *Nature genetics* .
- 318 10. Gronau I, Arbiza L, Mohammed J, Siepel A (2013) Inference of natural selection from interspersed  
319 genomic elements based on polymorphism and divergence. *Molecular biology and evolution* 30:  
320 1159–1171.
- 321 11. Torgerson DG, Boyko AR, Hernandez RD, Indap A, Hu X, et al. (2009) Evolutionary processes  
322 acting on candidate cis-regulatory regions in humans inferred from patterns of polymorphism and  
323 divergence. *PLoS genetics* 5: e1000592.

- 324 12. Eyre-Walker A, Keightley PD (2007) The distribution of fitness effects of new mutations. Nature  
325 Reviews Genetics 8: 610–618.
- 326 13. Eyre-Walker A, Woolfit M, Phelps T (2006) The distribution of fitness effects of new deleterious  
327 amino acid mutations in humans. Genetics 173: 891–900.
- 328 14. Williamson SH, Hernandez R, Fledel-Alon A, Zhu L, Nielsen R, et al. (2005) Simultaneous inference  
329 of selection and population growth from patterns of variation in the human genome. Proceedings  
330 of the National Academy of Sciences 102: 7882–7887.
- 331 15. Kousathanas A, Keightley PD (2013) A comparison of models to infer the distribution of fitness  
332 effects of new mutations. Genetics 193: 1197–1208.
- 333 16. Wloch DM, Szafraniec K, Borts RH, Korona R (2001) Direct estimate of the mutation rate and  
334 the distribution of fitness effects in the yeast *Saccharomyces cerevisiae*. Genetics 159: 441–452.
- 335 17. Sanjuán R, Moya A, Elena SF (2004) The distribution of fitness effects caused by single-nucleotide  
336 substitutions in an RNA virus. Proceedings of the National Academy of Sciences of the United  
337 States of America 101: 8396–8401.
- 338 18. Loewe L, Charlesworth B (2006) Inferring the distribution of mutational effects on fitness in  
339 *Drosophila*. Biology Letters 2: 426–430.
- 340 19. Keightley PD, Eyre-Walker A (2010) What can we learn about the distribution of fitness effects  
341 of new mutations from dna sequence data? Philosophical Transactions of the Royal Society B:  
342 Biological Sciences 365: 1187–1193.
- 343 20. Kircher M, Witten DM, Jain P, O’Roak BJ, Cooper GM, et al. (In press) A general framework for  
344 estimating the relative pathogenicity of human genetic variants .
- 345 21. Consortium GP (2010) A map of human genome variation from population-scale sequencing. Nature  
346 467: 1061–1073.
- 347 22. Consortium GP (2012) An integrated map of genetic variation from 1,092 human genomes. Nature  
348 491: 56–65.

- 349 23. Sawyer SA, Hartl DL (1992) Population genetics of polymorphism and divergence. *Genetics* 132:  
350 1161–1176.
- 351 24. Bustamante C, Nielsen R, Sawyer S, Olsen K, Purugganan M, et al. (2002) The cost of inbreeding  
352 in *Arabidopsis*. *Nature* 416: 531.
- 353 25. Smith NG, Eyre-Walker A (2002) Adaptive protein evolution in *Drosophila*. *Nature* 415: 1022–  
354 1024.
- 355 26. Harris K, Nielsen R (2013) Inferring demographic history from a spectrum of shared haplotype  
356 lengths. *PLoS genetics* 9: e1003521.
- 357 27. Loewe L, Charlesworth B (2007) Background selection in single genes may explain patterns of  
358 codon bias. *Genetics* 175: 1381–1393.
- 359 28. Lawrie DS, Messer PW, Hershberg R, Petrov DA (2013) Strong Purifying Selection at Synonymous  
360 Sites in *D. melanogaster*. *PLoS genetics* 9: e1003527.
- 361 29. Hindorff LA, Sethupathy P, Junkins HA, Ramos EM, Mehta JP, et al. (2009) Potential etiologic and  
362 functional implications of genome-wide association loci for human diseases and traits. *Proceedings*  
363 *of the National Academy of Sciences* 106: 9362–9367.
- 364 30. Boyle AP, Hong EL, Hariharan M, Cheng Y, Schaub MA, et al. (2012) Annotation of functional  
365 variation in personal genomes using RegulomeDB. *Genome research* 22: 1790–1797.
- 366 31. Lohmueller KE, Indap AR, Schmidt S, Boyko AR, Hernandez RD, et al. (2008) Proportionally  
367 more deleterious genetic variation in European than in African populations. *Nature* 451: 994–997.
- 368 32. Davies EK, Peters AD, Keightley PD (1999) High frequency of cryptic deleterious mutations in  
369 *Caenorhabditis elegans*. *Science* 285: 1748–1751.
- 370 33. Keightley PD (1996) Nature of deleterious mutation load in *Drosophila*. *Genetics* 144: 1993–1999.
- 371 34. Plotkin JB, Robins H, Levine AJ (2004) Tissue-specific codon usage and the expression of human  
372 genes. *Proceedings of the National Academy of Sciences of the United States of America* 101:  
373 12588–12591.

- 374 35. Hernandez RD, Kelley JL, Elyashiv E, Melton SC, Auton A, et al. (2011) Classic selective sweeps  
375 were rare in recent human evolution. *Science* 331: 920–924.
- 376 36. McVicker G, Gordon D, Davis C, Green P (2009) Widespread genomic signatures of natural selec-  
377 tion in hominid evolution. *PLoS genetics* 5: e1000471.
- 378 37. Scheinfeldt LB, Tishkoff SA (2013) Recent human adaptation: genomic approaches, interpretation  
379 and insights. *Nature Reviews Genetics* 14: 692–702.
- 380 38. McVean GA, Charlesworth B (2000) The effects of Hill-Robertson interference between weakly  
381 selected mutations on patterns of molecular evolution and variation. *Genetics* 155: 929–944.
- 382 39. Evans SN, Shvets Y, Slatkin M (2007) Non-equilibrium theory of the allele frequency spectrum.  
383 *Theoretical population biology* 71: 109–119.
- 384 40. Pollard KS, Hubisz MJ, Rosenbloom KR, Siepel A (2010) Detection of nonneutral substitution  
385 rates on mammalian phylogenies. *Genome research* 20: 110–121.
- 386 41. Siepel A, Bejerano G, Pedersen JS, Hinrichs AS, Hou M, et al. (2005) Evolutionarily conserved  
387 elements in vertebrate, insect, worm, and yeast genomes. *Genome research* 15: 1034–1050.
- 388 42. Adzhubei IA, Schmidt S, Peshkin L, Ramensky VE, Gerasimova A, et al. (2010) A method and  
389 server for predicting damaging missense mutations. *Nat Methods* 7: 248–249.

## Figures

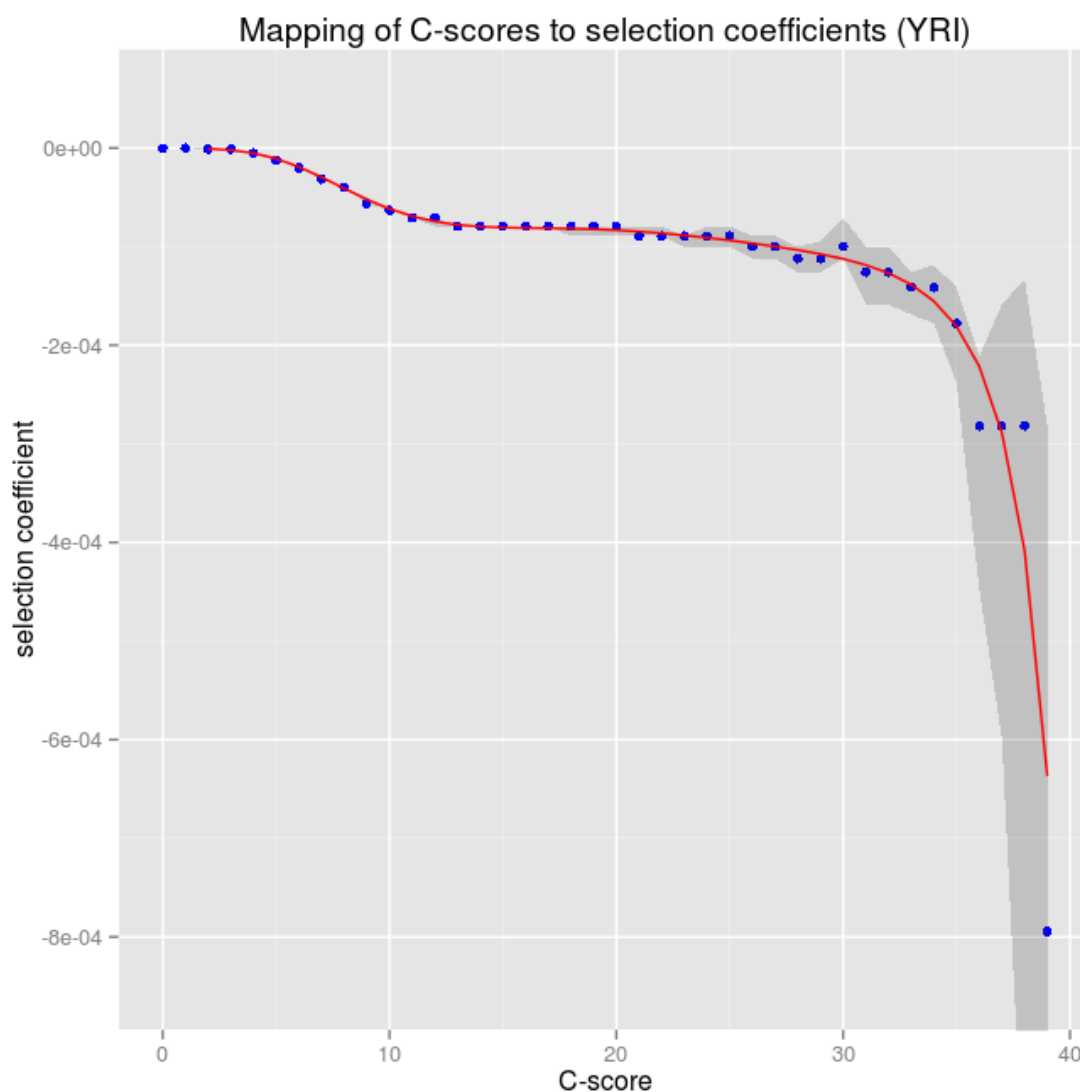

**Figure 1. Mapping of C-scores to selection coefficients using YRI 1000G polymorphisms.** Red dots represent the maximum likelihood selection coefficient corresponding to each C-score bin. The blue line is a polynomial fitted to the discrete mappings using partial least-squares regression on the mapping of C-scores to log-scaled selection coefficients (after excluding the neutral bins). The grey shade is a 95% confidence interval obtained from bootstrapping the data 100 times in each bin.



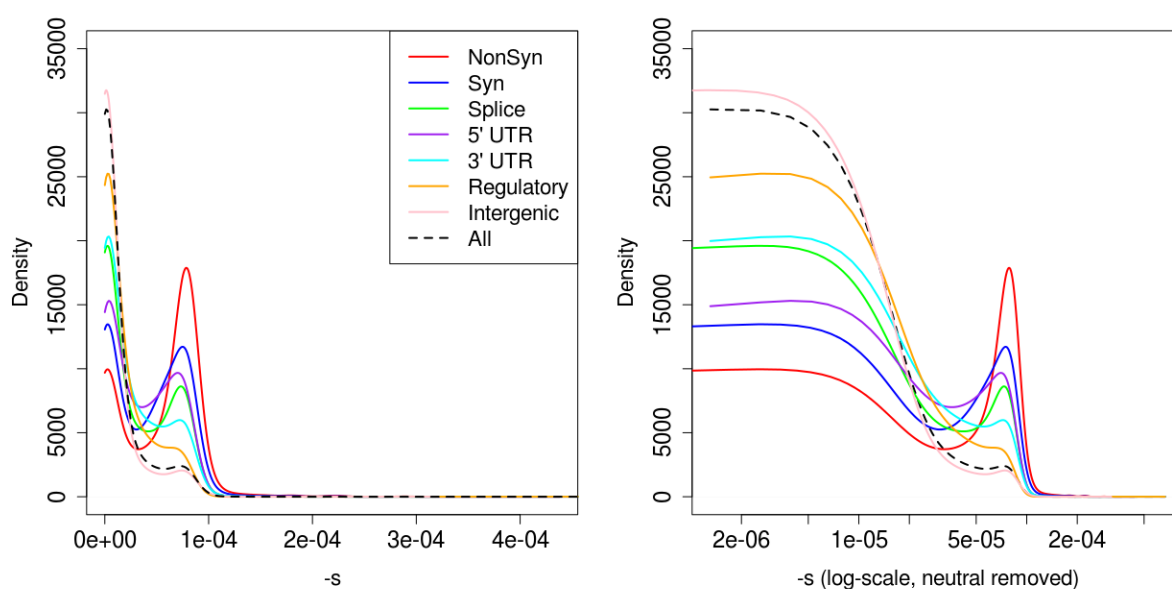

**Figure 2. Distribution of fitness effects among YRI polymorphisms, partitioned by the genomic consequence of the mutated site.** The right panel shows a zoomed-in version of the same distributions after removing neutral polymorphisms and log-scaling the x-axis. Consequences were determined using the Ensembl Variant Effect Predictor (v.2.5). If more than one consequence existed for a given SNP, that SNP was assigned to the most severe of the predicted categories, following the VEP's hierarchy of consequences. NonSyn = nonsynonymous. Syn = synonymous. Splice = splice site.

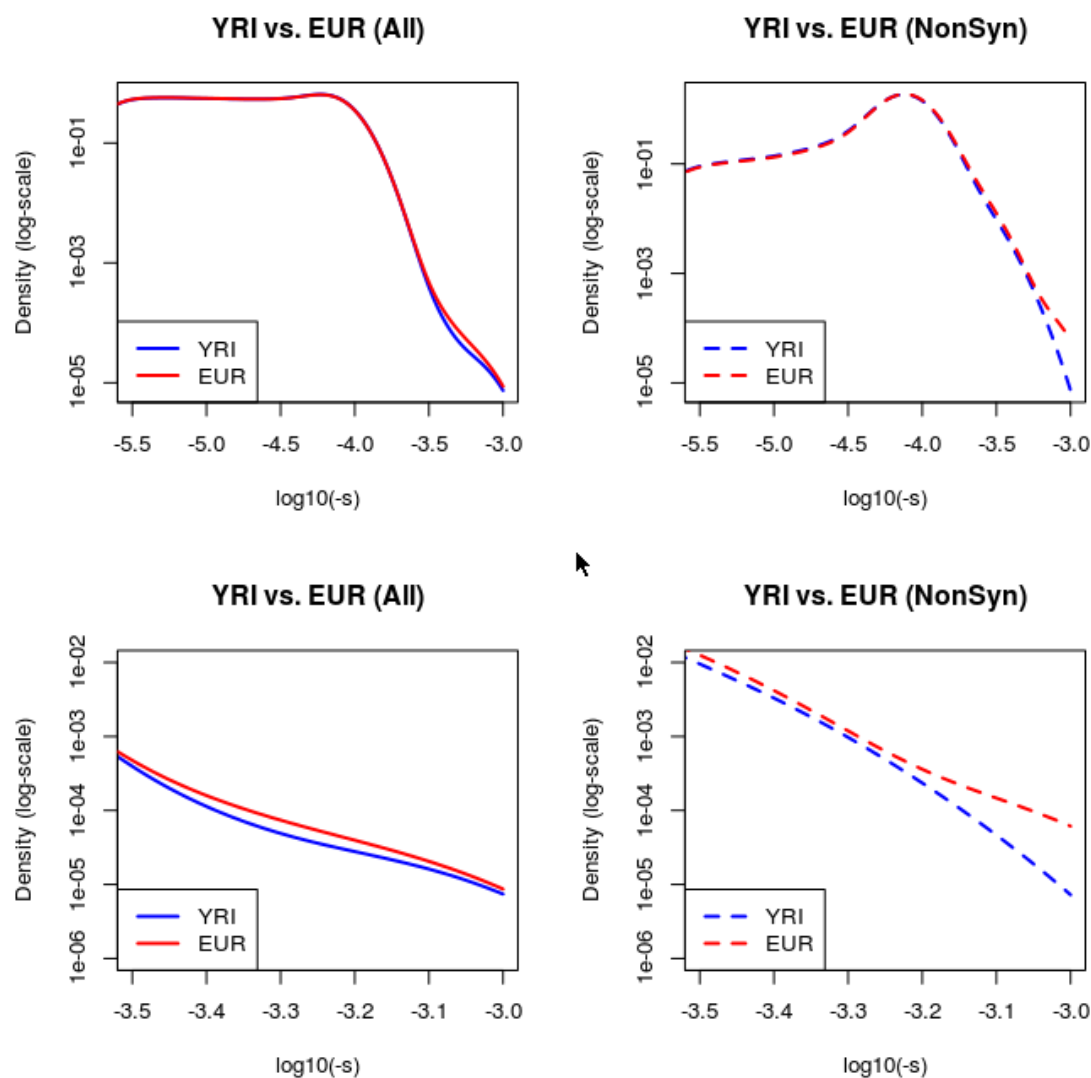

**Figure 3. Comparison between the fitness effect densities corresponding to Yoruba and European polymorphisms with  $s < 0$ .** In all panels, the y-axis is on a log-scale. The density was computed using a smoothing bandwidth = 0.15. Left panels: distributions of all polymorphisms. Right panels: distributions of nonsynonymous polymorphisms. The bottom panels are a zoomed-in version of the top panels, focusing on highly deleterious mutations ( $-3.5 < \log_{10}(-s) < -3$ ).

## 391 Tables

**Table 1.** Characteristics of fitness effect distributions estimated for YRI SNPs classified by different genomic consequence categories.

| Category      | Number of polymorphisms | Proportion $s=0$ | Proportion $ s  > 10^{-5}$ | Proportion $ s  > 5 * 10^{-5}$ | Proportion $ s  > 10^{-4}$ | Mean $\log_{10}(-s)$ , for all $s \neq 0$ | SD $\log_{10}(-s)$ , for all $s \neq 0$ |
|---------------|-------------------------|------------------|----------------------------|--------------------------------|----------------------------|-------------------------------------------|-----------------------------------------|
| All           | 15956570                | 57.76%           | 25.26%                     | 9.16%                          | 0.08%                      | -4.8276                                   | 0.5054                                  |
| Nonsynonymous | 71242                   | 17.80%           | 75.89%                     | 60.95%                         | 2.51%                      | -4.2885                                   | 0.3661                                  |
| Synonymous    | 133797                  | 23.05%           | 67.70%                     | 46.45%                         | 1.35%                      | -4.3989                                   | 0.4122                                  |
| Splice site   | 21353                   | 33.15%           | 52.98%                     | 30.27%                         | 0.30%                      | -4.5505                                   | 0.4796                                  |
| 5' UTR        | 53130                   | 21.77%           | 65.17%                     | 36.07%                         | 0.30%                      | -4.5116                                   | 0.4396                                  |
| 3' UTR        | 169336                  | 31.14%           | 52.71%                     | 23.34%                         | 0.37%                      | -4.6233                                   | 0.4681                                  |
| Regulatory    | 1511150                 | 39.18%           | 40.12%                     | 13.45%                         | 0.03%                      | -4.7734                                   | 0.4792                                  |
| Intergenic    | 6211005                 | 62.43%           | 21.33%                     | 7.93%                          | 0.12%                      | -4.8560                                   | 0.5140                                  |
| GWAS          | 9673                    | 45.90%           | 33.31%                     | 12.28%                         | 0.14%                      | -4.8028                                   | 0.5008                                  |

**Table 2.** Characteristics of fitness effect distributions estimated for YRI SNPs classified by different RegulomeDB regulatory categories.

| RegulomeDB Category                                                 | Number of polymorphisms | Proportion $s=0$ | Proportion $ s  > 10^{-5}$ | Proportion $ s  > 5 * 10^{-5}$ | Proportion $ s  > 10^{-4}$ | Mean $\log_{10}(-s)$ , for all $s \neq 0$ | SD $\log_{10}(-s)$ , for all $s \neq 0$ |
|---------------------------------------------------------------------|-------------------------|------------------|----------------------------|--------------------------------|----------------------------|-------------------------------------------|-----------------------------------------|
| eQTL+TF binding+matched TF motif+matched DNase Footprint+DNase peak | 274                     | 28.83%           | 50.00%                     | 20.80%                         | 0.00%                      | -4.7019                                   | 0.4819                                  |
| TF binding+matched TF motif+matched DNase Footprint+DNase peak      | 18080                   | 32.09%           | 48.74%                     | 22.02%                         | 0.06%                      | -4.6733                                   | 0.4891                                  |
| eQTL+TF binding+any motif+DNase Footprint+DNase peak                | 2140                    | 32.71%           | 45.79%                     | 16.07%                         | 0.14%                      | -4.7487                                   | 0.4772                                  |
| TF binding+any motif+DNase Footprint+DNase peak                     | 174285                  | 38.08%           | 41.94%                     | 16.05%                         | 0.08%                      | -4.7398                                   | 0.4893                                  |
| eQTL+TF binding+any motif+DNase peak                                | 1385                    | 40.36%           | 40.43%                     | 14.73%                         | 0.14%                      | -4.7572                                   | 0.4923                                  |
| TF binding+DNase peak                                               | 592313                  | 40.53%           | 39.11%                     | 13.84%                         | 0.08%                      | -4.7690                                   | 0.4874                                  |
| eQTL+TF binding+matched TF motif                                    | 46                      | 43.48%           | 36.96%                     | 21.74%                         | 0.00%                      | -4.7214                                   | 0.5677                                  |
| eQTL+TF binding / DNase peak                                        | 28697                   | 44.88%           | 34.67%                     | 11.88%                         | 0.05%                      | -4.8007                                   | 0.4902                                  |
| TF binding+any motif+DNase peak                                     | 138492                  | 44.90%           | 35.59%                     | 13.16%                         | 0.13%                      | -4.7748                                   | 0.4958                                  |
| TF binding+matched TF motif+DNase peak                              | 7691                    | 47.12%           | 33.86%                     | 11.73%                         | 0.05%                      | -4.7943                                   | 0.4914                                  |
| TF binding or DNase peak                                            | 2281669                 | 50.99%           | 29.70%                     | 10.71%                         | 0.11%                      | -4.8194                                   | 0.5030                                  |
| eQTL+TF binding+matched TF motif+DNase peak                         | 70                      | 51.43%           | 31.43%                     | 11.43%                         | 0.00%                      | -4.7233                                   | 0.4878                                  |
| TF binding+matched TF motif                                         | 6873                    | 58.74%           | 24.12%                     | 8.29%                          | 0.06%                      | -4.8432                                   | 0.5015                                  |

## 392 Supplementary Figures

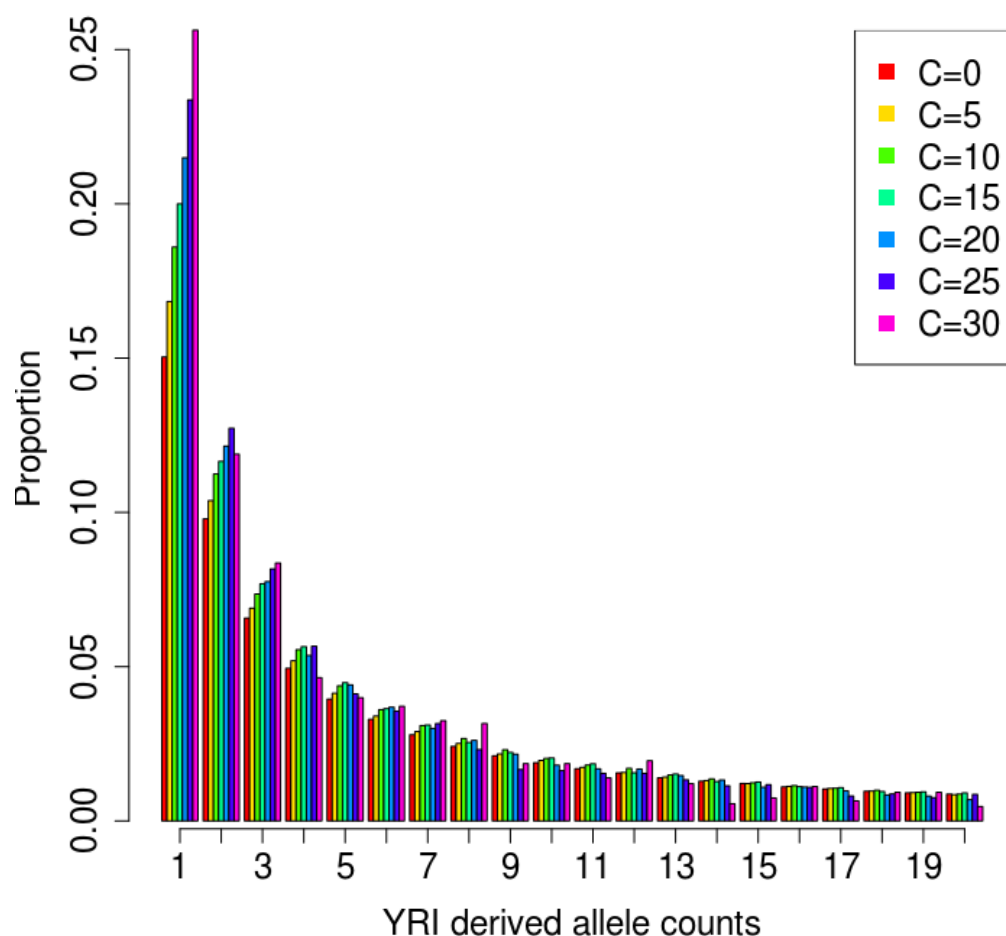

**Figure S1. First 20 bins of the observed SFS for sites under different C-score bins.** Note that the spectrum gets more skewed towards singletons with increasing C-scores, likely reflecting the action of negative selection on deleterious mutations.

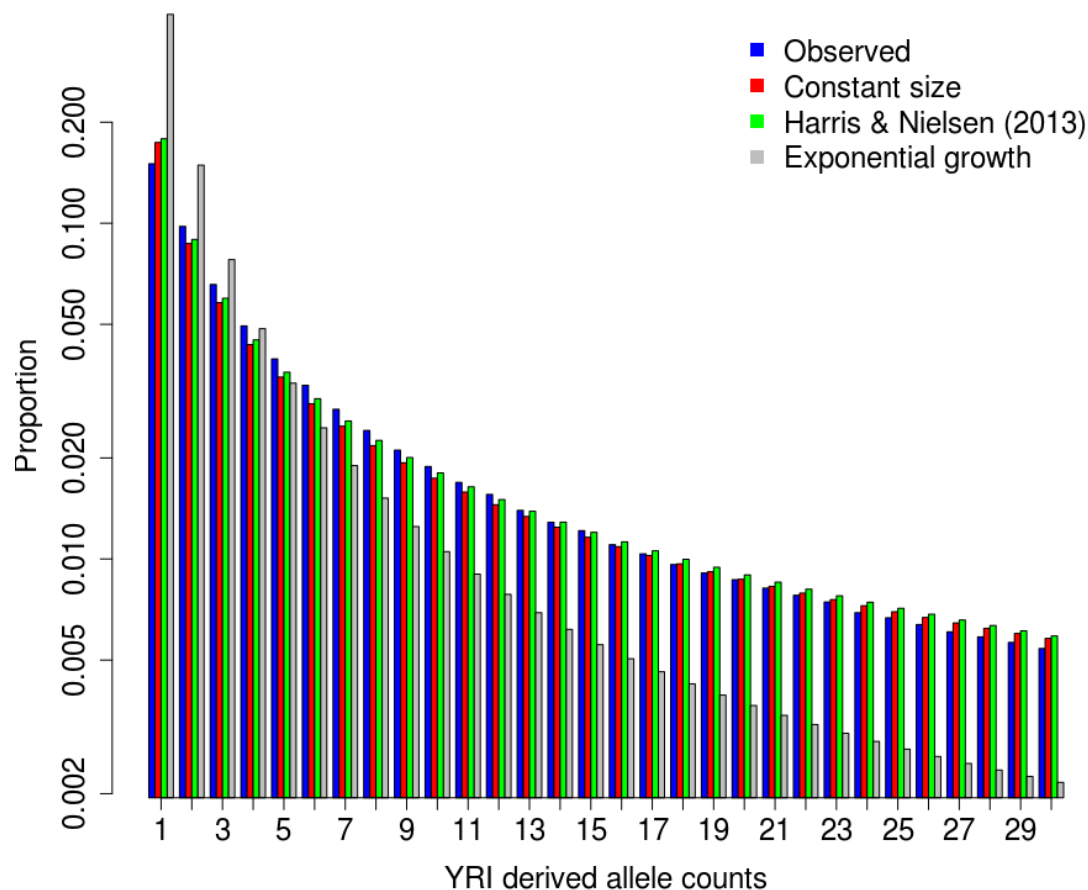

**Figure S2. First 30 bins of the observed SFS for sites with  $C=0$  (blue).** The full SFS was fit to different models of neutral evolution under the Harris and Nielsen (2013) model (green), a model of constant size (red) or an exponentially growing population size model (here only shown running for  $t=10,000$  generations at rate 5, grey). The y-axis is on a log-scale. The best-fitting exponential growth model was the one with the smallest rate (1) and duration (1,000 generations) and looked similar to the constant and Harris and Nielsen models, but was still not as good a fit as either of the latter two.

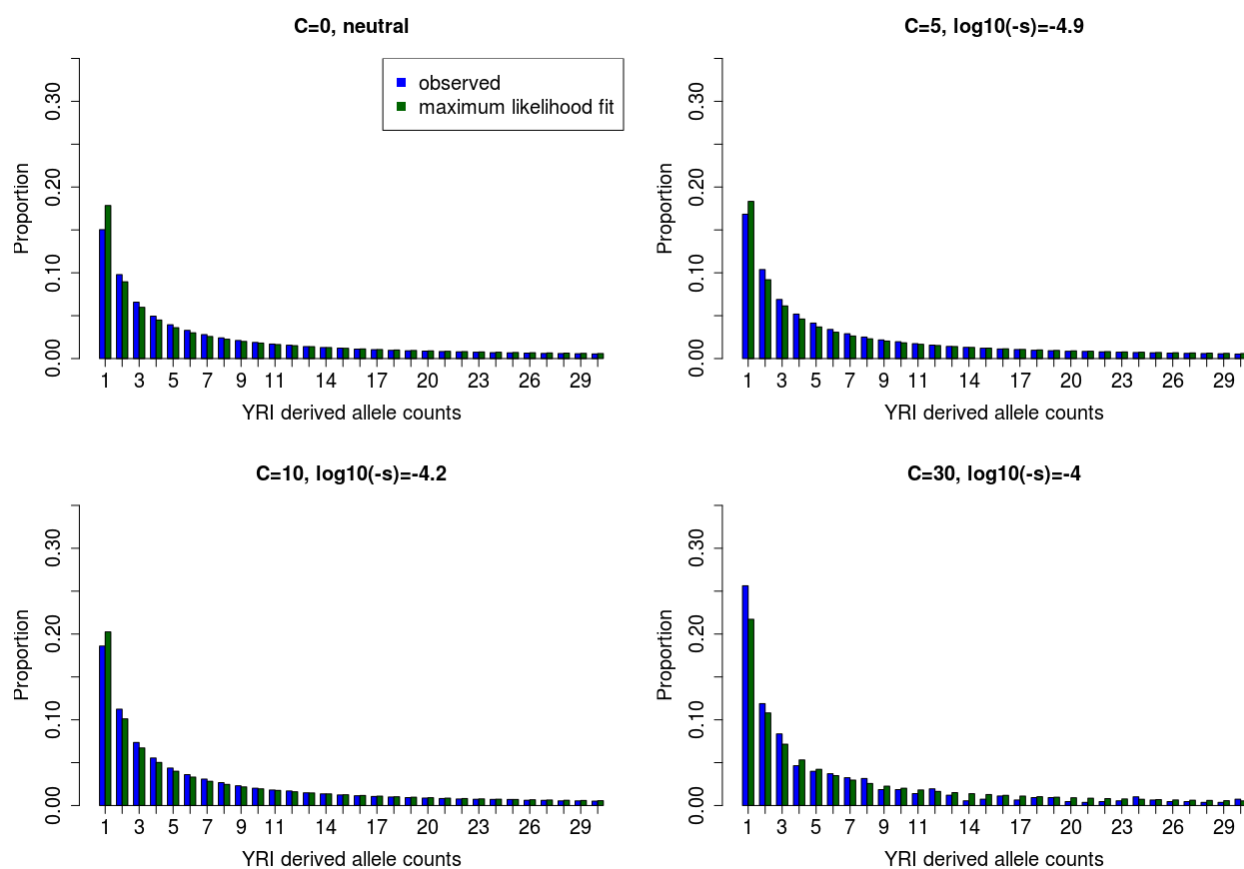

Figure S3. First 30 bins of the observed SFS for a few representative C-score bins and their corresponding maximum likelihood selection models.

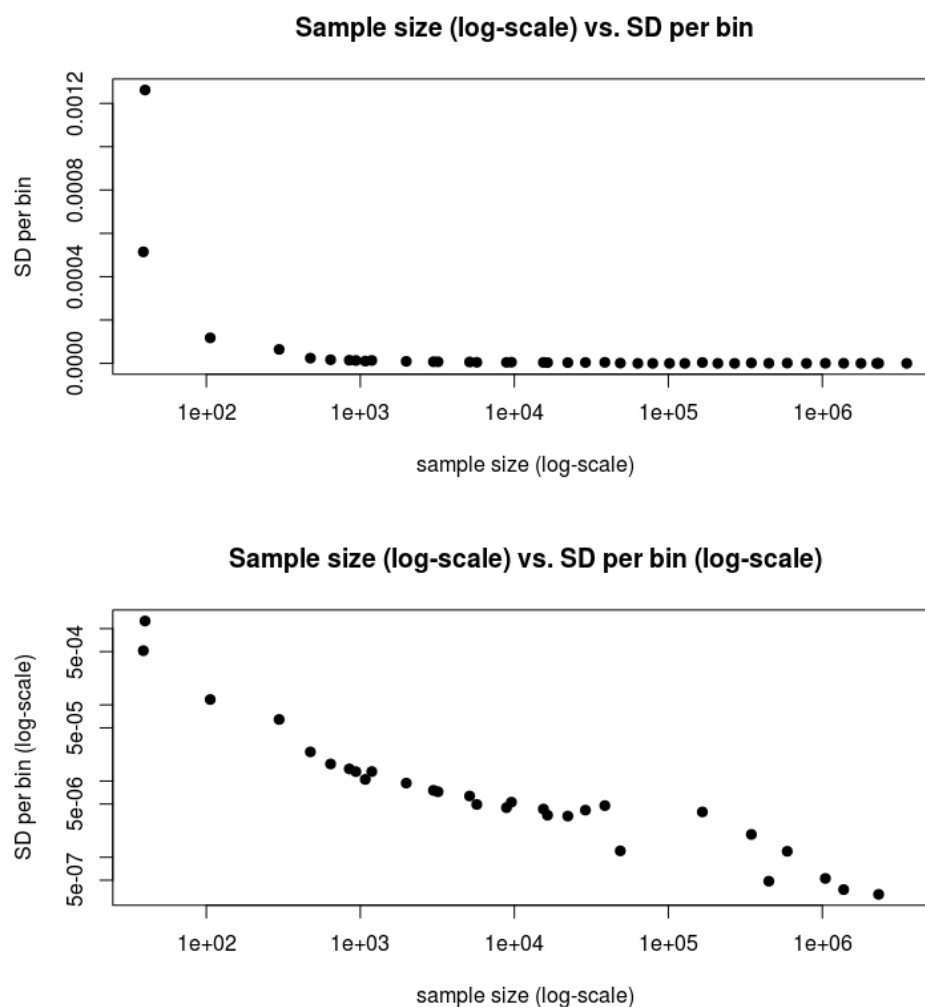

**Figure S4. Comparison of standard deviations and size of bins.** Top panel: Standard deviation per C-score bin plotted as a function of sample size per bin (log-scale). Bottom panel: Same plot but with the y-axis on a log-scale.

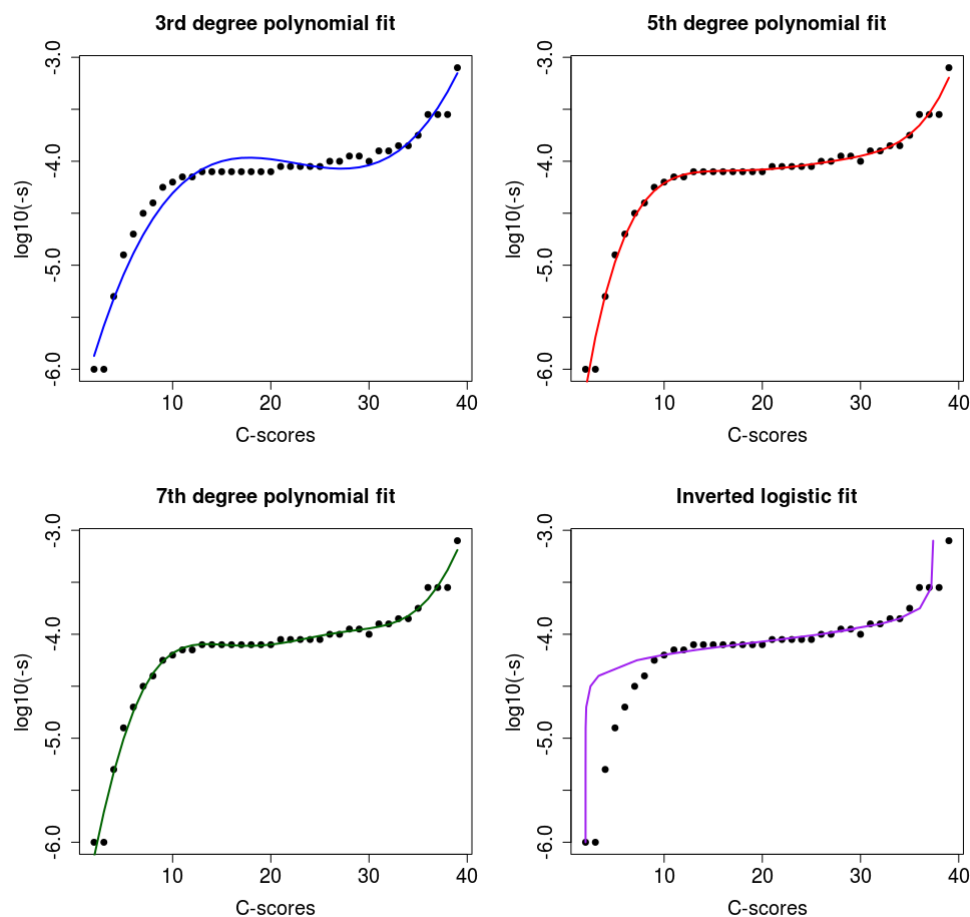

**Figure S5. Fitting of different functions to C-score mappings.** We attempted to fit polynomial functions to  $\log(-s)$  as a function of C-scores and a logistic function to C-scores as a function of  $\log(-s)$ . We find that the polynomial functions are a better fit than the logistic function, and, among the polynomial functions, the 5th degree polynomial (with a sum of least squares = 0.1962) is the only one that is both monotonically increasing and not showing signs of overfitting.



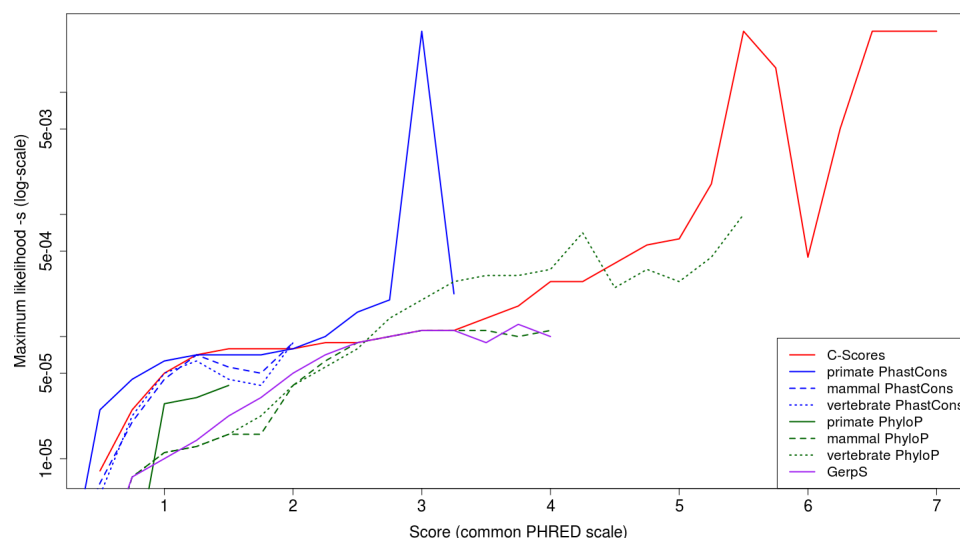

**Figure S6. Maximum likelihood mapping of different types of scores to a selection coefficient scale, excluding bins mapped to neutrality.** Before mapping, scores were re-scaled on a common PHRED scale (see main text). The wide fluctuations to the right of the image are due to the small number of sites per bin at highly deleterious bins. We exclude these bins when fitting C-scores to selection coefficients in our main analysis.

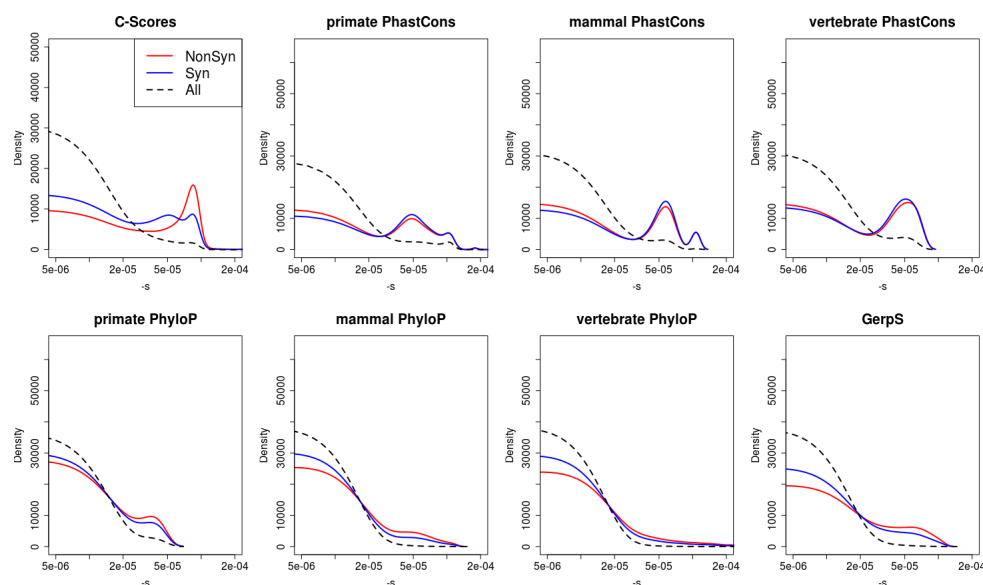

**Figure S7. Distribution of fitness effects at nonsynonymous, synonymous and all polymorphisms in Yoruba, using different types of conservation scores for mapping.** We note that some form of bimodality at coding sites is observed in all but one of the distributions.

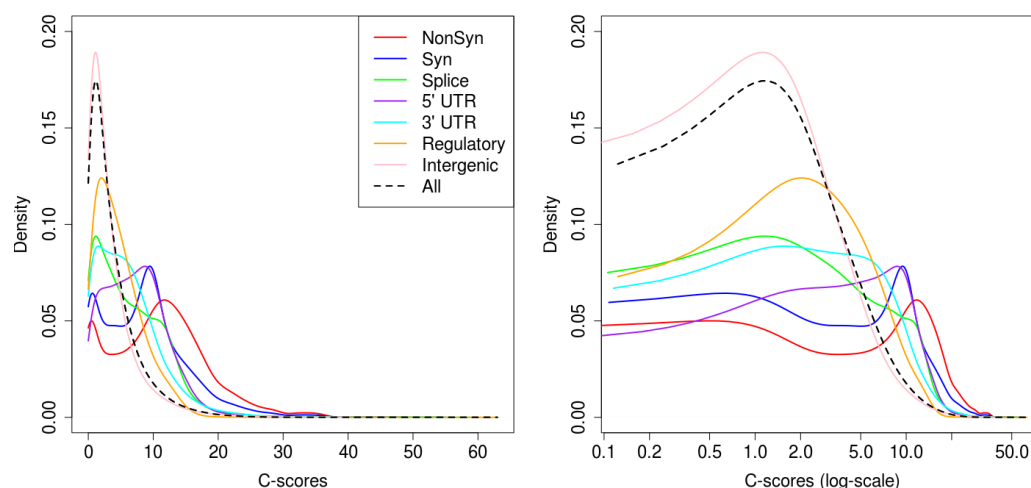

**Figure S8. Distribution of unmapped C-scores among YRI polymorphisms, partitioned by the genomic consequence of the mutated site.** Consequences were determined using the Ensembl Variant Effect Predictor (v.2.5). NonSyn = nonsynonymous. Syn = synonymous. Splice = splice site.

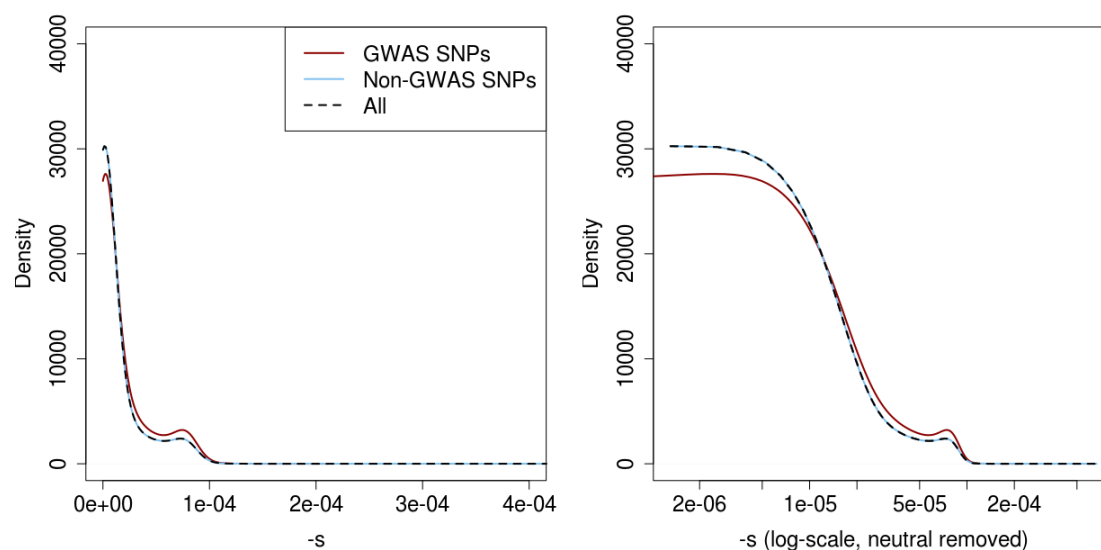

**Figure S9. Distribution of fitness effects among YRI polymorphisms, partitioned by whether the SNPs are found in the GWAS database or not.** The right panel shows a zoomed-in version of the same distributions after removing neutral polymorphisms and log-scaling the x-axis.

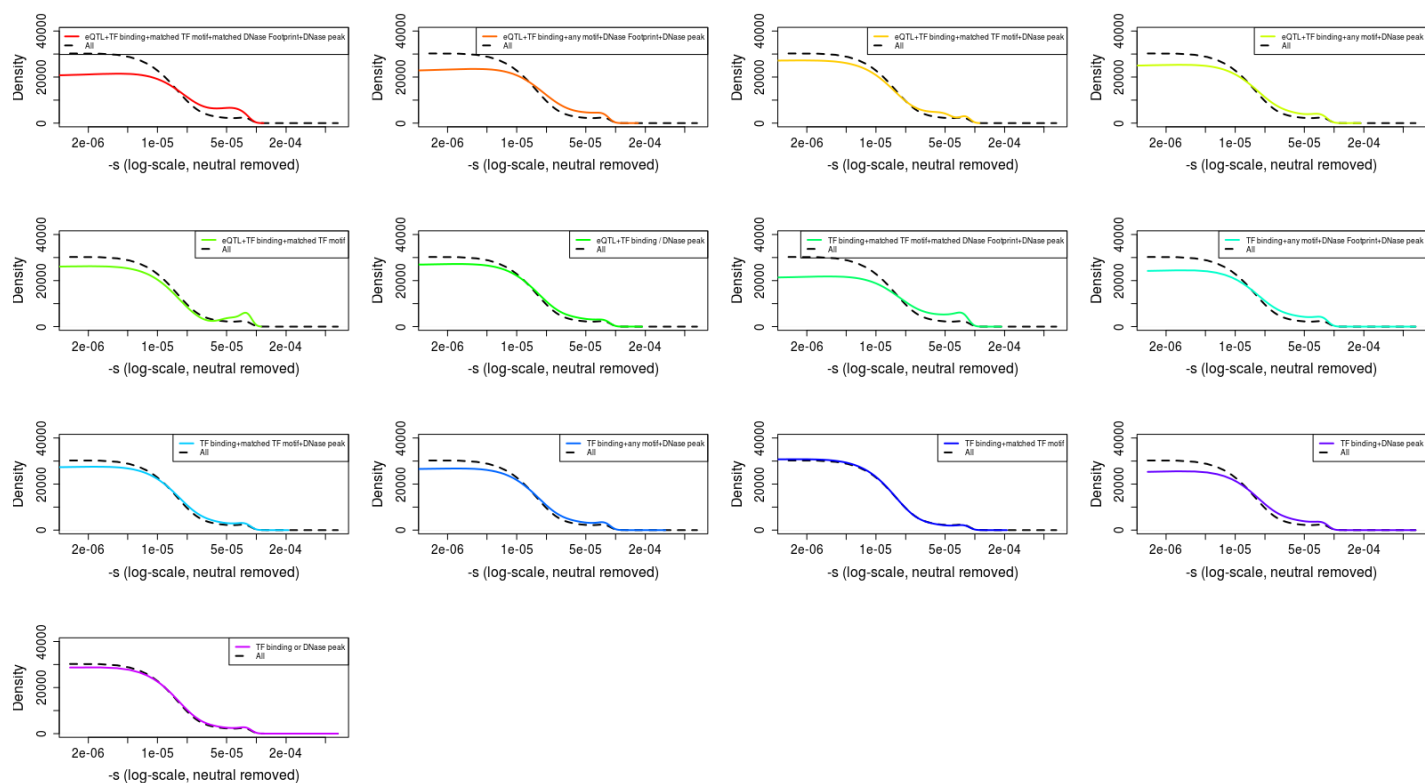

**Figure S10. Distribution of fitness effects among different types of RegulomeDB regulatory YRI polymorphisms, obtained from various ENCODE assays.** The black dashed line corresponds to the distribution of all YRI SNPs.
